# Supplementary material for: An archaeal CBASS system eliminates viruses without killing the host cells
Source: Research Square preprint supplement (doi:10.21203/rs.3.rs-7007075/v1), 2025-07-14
Supplement: Supplementary file 1 [file b3c663ec18aa993999f22a0b.pdf]

**Table 1. Abundance of HFPV-1 Proteins During H-CBASS2 Expression.**

HFPV-1 proteins detected in infected *H. volcanii* cells by MS/MS. The "Fold Change" column represents the ratio of the mean of two biological replicates (**R1 - Replicate 1, R2 - Replicate 2**) of infected control and H-CBASS2 cells. The housekeeping gene DNA polymerase (*polB1*) was used as a control since its expression is expected to be unaffected by H-CBASS2.

| Description                                    | Control+<br>HFPV-<br>1(R1) | Control+<br>HFPV-<br>1(R2) | H-CBASS2+HFPV-<br>1(R1) | H-CBASS2+HFPV-<br>1(R2) | Fold<br>change |
|------------------------------------------------|----------------------------|----------------------------|-------------------------|-------------------------|----------------|
| DNA polymerase (polB1)                         | 2.30E+09                   | 2.69E+09                   | 2.96E+09                | 2.34E+09                | 1.06           |
| Putative Transcriptional<br>regulator [HFPV-1] | 3.73E+08                   | 6.88E+08                   | ND                      | ND                      | N/A            |
| Hypothetical protein<br>[HFPV-1]               | 8.66E+08                   | 1.90E+09                   | 4.33E+08                | 1.70E+08                | 0.22           |
| DNA binding protein<br>[HFPV-1]                | 4.80E+09                   | 5.94E+09                   | 7.30E+09                | 5.26E+09                | 1.17           |
| Spike protein [HFPV-1]                         | 3.21E+08                   | 1.11E+09                   | 4.15E+09                | 2.82E+09                | 2.47           |
| Hypothetical protein<br>[HFPV-1]               | ND                         | 1.82E+07                   | 1.50E+08                | 9.34E+07                | 6.67           |
| Hypothetical protein<br>[HFPV-1]               | 5.58E+07                   | ND                         | ND                      | ND                      | N/A            |
