# Supplementary material for: An archaeal CBASS system eliminates viruses without killing the host cells
Source: Research Square preprint supplement (doi:10.21203/rs.3.rs-7007075/v1), 2025-07-14
Supplement: Supplementary file 1 [file bf294d6ed010d46a33700756.xlsx]

## Sheet: Sheet 1
	Table-2
	This table contains all the importent mutations from sequenced colonies.
	Mutations found in control strains after passaging are highlighted in gray, while mutations in virus-cured colonies after passaging are highlighted in yellow.
	Sample1-4-Control-Wt+Virues after 10th passage
	Sample5-9-Cbass+Virus cured after 10th passage
	Sample10-11-Another Control_Cbass+Virus before passaging
		HVO-Number	Description	P1-Coordinate of the mutation	Refrence	Mutations	Sample-1	Sample-2	Sample-3	Sample-4	Sample-5	Sample-6	Sample-7	Sample-8	Sample-9	Sample-10	Sample-11
	Common mutated gene associated with lipoprotein	Upstream of HVO_2285 | Downstream of HVO_2286	Closest: uncharacterized protein	2149920	.	T	-	-	+	-	-	-	-	-	-	-	-
		Upstream of HVO_2285 | Downstream of HVO_2286	Closest: uncharacterized protein	2149924	C	T	-	-	+	-	-	-	-	-	-	-	-
		Upstream of HVO_2285 | Downstream of HVO_2286	Closest: uncharacterized protein	2149925	T	G	-	-	+	-	-	-	-	-	-	-	-
		HVO_2286	uncharacterized protein	2150880	.	C	-	-	+	-	-	-	-	-	-	-	-
		Upstream of HVO_2285 | Downstream of HVO_2286	Closest: uncharacterized protein	2149922	A	C	-	-	-	+	-	-	-	-	-	-	-
		Upstream of HVO_2285 | Downstream of HVO_2286	Closest: uncharacterized protein	2149923	G	A	-	-	-	+	-	-	-	-	-	-	-
		Upstream of HVO_2285 | Downstream of HVO_2286	Closest: uncharacterized protein	2149921	.	C	-	-	-	-	-	-	+	+	-	-	-
		Upstream of HVO_2285 | Downstream of HVO_2286	Closest: uncharacterized protein	2149921	.	G	-	-	-	-	-	-	-	-	+	-	-
		HVO_1411	uncharacterized protein	1284523	T	C	-	-	-	-	+	-	-	-	-	-	-
		HVO_2149	uncharacterized protein	2012335	C	.	-	-	-	-	-	+	-	-	+	-	-
	Mutation are only in the virus-cured strain	HVO_0066	PQQ repeat protein	67976	.	C	-	-	-	-	+	-	-	-	-	-	-
		HVO_0066	PQQ repeat protein	67976	G	C	-	-	-	-	-	-	-	+	-	-	-
	Mutated gene only in control	HVO_2266	uncharacterized protein	2124108	T	A	+	-	-	-	-	-	-	-	-	-	-
		HVO_2266	uncharacterized protein	2124209	C	T	-	+	-	-	-	-	-	-	-	-	-
	Common mutated gene in both Control as well as in cured	Upstream of HVO_2228 | Downstream of HVO_2229	Closest: PHP domain protein	2093291	G	C	+	-	-	-	-	-	-	+	-	-	-
		HVO_0511	glucose-6-phosphate 1-dehydrogenase (NAD)	448337	A	C	-	-	+	-	-	-	-	+	-	-	-
		Upstream of_1929 | Downstream of HVO_1930A	Closest: HTH-10 family transcription regulator	1778467	.	G	-	-	+	-	-	-	-	-	+	-	-
		HVO_2055	putative low-salt glycan biosynthesis flippase	1904727	.	G	-	-	-	+	-	-	-	-	+	-	-
